# Supplementary material for: Alterations of the gut ecological and functional microenvironment in different stages of multiple sclerosis
Source: PubMed Central journal article supplement — Proc Natl Acad Sci U S A. 2020 Aug 24;117(36):22402–12. doi: 10.1073/pnas.2011703117 (PMC7486801; doi:10.1073/pnas.2011703117), 2020-08-24
Supplement: pnas.2011703117.sapp.pdf [file pnas.2011703117.sapp.pdf]

## Appendix

### **Alterations of the gut ecological and functional microenvironment in different stages of multiple sclerosis**

Daiki Takewaki, Wataru Suda, Wakiro Sato, Lena Takayasu, Naveen Kumar, Kimitoshi Kimura, Naoko Kaga, Toshiki Mizuno, Sachiko Miyake, Masahira Hattori, and Takashi Yamamura

## Table of Contents

|                                                                                                                                                                                     |   |
|-------------------------------------------------------------------------------------------------------------------------------------------------------------------------------------|---|
| Supplementary Figure and Table Legends.....                                                                                                                                         | 3 |
| Figure S1. Comparison of the microbial abundance between the five subject groups at the phylum and genus levels. ....                                                               | 3 |
| Figure S2. Comparison of the microbial abundance in significantly increased or decreased species/OTUs between the five subject groups. ....                                         | 3 |
| Figure S3. Differences in functional profile of gut microbiome between RRMS and healthy controls. ....                                                                              | 3 |
| Table S1. Demographics and characteristics of the five groups. ....                                                                                                                 | 3 |
| Table S2. Validation of the differences in gender and immunotherapy based on gut microbiome beta diversity. ....                                                                    | 3 |
| Table S3. Summary of abundance of microbial species at the genus-level. ....                                                                                                        | 4 |
| Table S4. The 16S-based significant changes in abundance for all species/OTUs between any two groups among the five subject groups. ....                                            | 4 |
| Table S5. Similarity of 16S rRNA gene V1-V2 region for species/OTUs exhibiting significant changes in abundance (RRMS vs HC) between the present paper and our previous paper. .... | 4 |
| Table S6. KEGG orthologies having significant changes in abundance between two of the five groups based on the metagenomic data. ....                                               | 4 |
| Table S7. Demographics and characteristics of the three groups in metabolite analysis. ....                                                                                         | 4 |
| References.....                                                                                                                                                                     | 5 |
| Supplementary Figures.....                                                                                                                                                          | 6 |
| Supplementary Tables.....                                                                                                                                                           | 9 |

## Supplementary Figure and Table Legends

### Figure S1. Comparison of the microbial abundance between the five subject groups at the phylum and genus levels.

(A) Comparison of the abundance at the phylum level between the five groups based on 16S data. Phyla with an average relative abundance  $\geq 0.1\%$  in at least one group are represented. (B) Comparison of the abundance at the genus level between the five groups based on 16S data. Genera with an average relative abundance  $\geq 0.5\%$  in at least one subject group are represented. Each box plot represents median, interquartile range, minimum, and maximum values. \* $p < 0.05$  based on the Wilcoxon rank sum test with the Benjamini-Hochberg method for multiple group comparisons.

### Figure S2. Comparison of the microbial abundance in significantly increased or decreased species/OTUs between the five subject groups.

Comparison of the abundance at the species/OTU level between the five groups based on 16S data. Species/OTUs that were significantly increased or decreased between the five groups are represented. Each box plot represents median, interquartile range, minimum, and maximum values. \* $p < 0.05$ , \*\* $p < 0.01$ , \*\*\* $p < 0.001$ , and \*\*\*\* $p < 0.0001$  based on the Wilcoxon rank sum test with the Benjamini-Hochberg method for multiple group comparisons.

### Figure S3. Differences in functional profile of gut microbiome between RRMS and healthy controls.

(A) The list of 97 significantly enriched and 117 significantly depleted KEGG orthologies (KOs) in the RRMS group compared to those in the HC group (Wilcoxon test,  $p < 0.05$ ). The Z-score based on the abundance of each KO is depicted from lowest (blue) to highest (red) according to the scale shown at the top. (B) List of KEGG pathways including at least one of the 97 significantly enriched KOs (RRMS-enriched KOs) or one of the 117 significantly depleted KOs (RRMS-depleted KOs) in the comparisons between the HC and RRMS groups. These individual pathways are ranked based on the ratios of RRMS-enriched KOs to -depleted KOs.  $p$ -value is based on the Fisher's exact test.

### Table S1. Demographics and characteristics of the five groups.

Sixty-two patients with RRMS, 15 patients with SPMS, 21 patients with atypical MS, 20 patients with NMOSD, and 55 healthy controls were recruited. Samples from twenty of the 62 RRMS patients were previously subjected to 16S analysis (1). Data are represented as mean  $\pm$  SEM. **Abbreviations:** BMI = body mass index; ARR = annual relapse rate; EDSS = expanded disability status scale; PSL = prednisolone; IS = immunosuppressive drugs; DMDs; disease modifying drugs; IFN- $\beta$  = interferon- $\beta$ ; GA = glatiramer acetate; FTY = fingolimod; NTZ = natalizumab; DMF = dimethyl fumarate; HC = healthy control; RRMS = relapsing remitting multiple sclerosis; SPMS = secondary progressive multiple sclerosis; atypical MS = atypical multiple sclerosis; NMOSD = neuromyelitis optica spectrum disorder. A  $p$ -value based on comparisons between the RRMS, SPMS, atypical MS, and NMOSD groups (Chi-squared test). B  $p$ -value based on comparisons between the RRMS, atypical MS, and NMOSD groups (Kruskal-Wallis test).

### Table S2. Validation of the differences in gender and immunotherapy based on gut microbiome beta diversity.

Beta diversity indexes based on UniFrac analysis.  $R^2$  and statistical test in permutational multivariate analysis of variance between HCs (female) and HCs (male) and between RRMS patients receiving immunotherapy and RRMS patients not receiving immunotherapy. UniFrac distance was based on the 16S data.

**Table S3. Summary of abundance of microbial species at the genus-level.**

An average abundance was calculated from 3,000 16S reads. Data are represented as mean  $\pm$  SEM.

**Table S4. The 16S-based significant changes in abundance for all species/OTUs between any two groups among the five subject groups.**

Thirty species/OTUs exhibited a significant increase or decrease (Wilcoxon test,  $p < 0.05$ ) between any pair of the five subject groups. The statistical procedure was based on Wilcoxon rank sum test with the Benjamini-Hochberg method for multiple group comparisons. 1 Hyphen indicates  $\geq 97\%$  identity with 16S rRNA gene V1-2 of the corresponding closest known species. 2 G1 / G2 indicates an average relative abundance in the Group 1 (G1) / an average relative abundance in the Group 2 (G2). Read number = 1 was assumed for “not detected” to calculate G1 / G2.

**Table S5. Similarity of 16S rRNA gene V1-V2 region for species/OTUs exhibiting significant changes in abundance (RRMS vs HC) between the present paper and our previous paper.**

Seventeen species/OTUs (12 mapped clusters and five unmapped OTUs) with significant changes in abundance between RRMS and HC groups in the present paper are shown in blue. Twenty-one species/OTUs (15 mapped clusters and six unmapped OTUs) with significant changes in abundance between the RRMS and HC groups in our previous paper (1) are shown in red. “Mapped CLs” and “relusts” correspond mapped clusters. “Unmapped\_OTUs” and “unmap\_OTUs” correspond unmapped OTUs.

**Table S6. KEGG orthologies having significant changes in abundance between two of the five groups based on the metagenomic data.**

**Abbreviations:** KO = KEGG orthology; G1 = Group 1; G2 = Group 2.

**Table S7. Demographics and characteristics of the three groups in metabolite analysis.**

Demographics and characteristics of the HC, RRMS, and SPMS groups with respect to the measurements of fecal metabolites. Data are represented as mean  $\pm$  SEM. **Abbreviations:** BMI = body mass index; ARR = annual relapse rate; EDSS = expanded disability status scale; HC = healthy control; RRMS = relapsing remitting multiple sclerosis; SPMS = secondary progressive multiple sclerosis.

## References

1. S. Miyake *et al.*, Dysbiosis in the Gut Microbiota of Patients with Multiple Sclerosis, with a Striking Depletion of Species Belonging to Clostridia XIVa and IV Clusters. *PLoS One* **10**, e0137429 (2015).

Figure S1

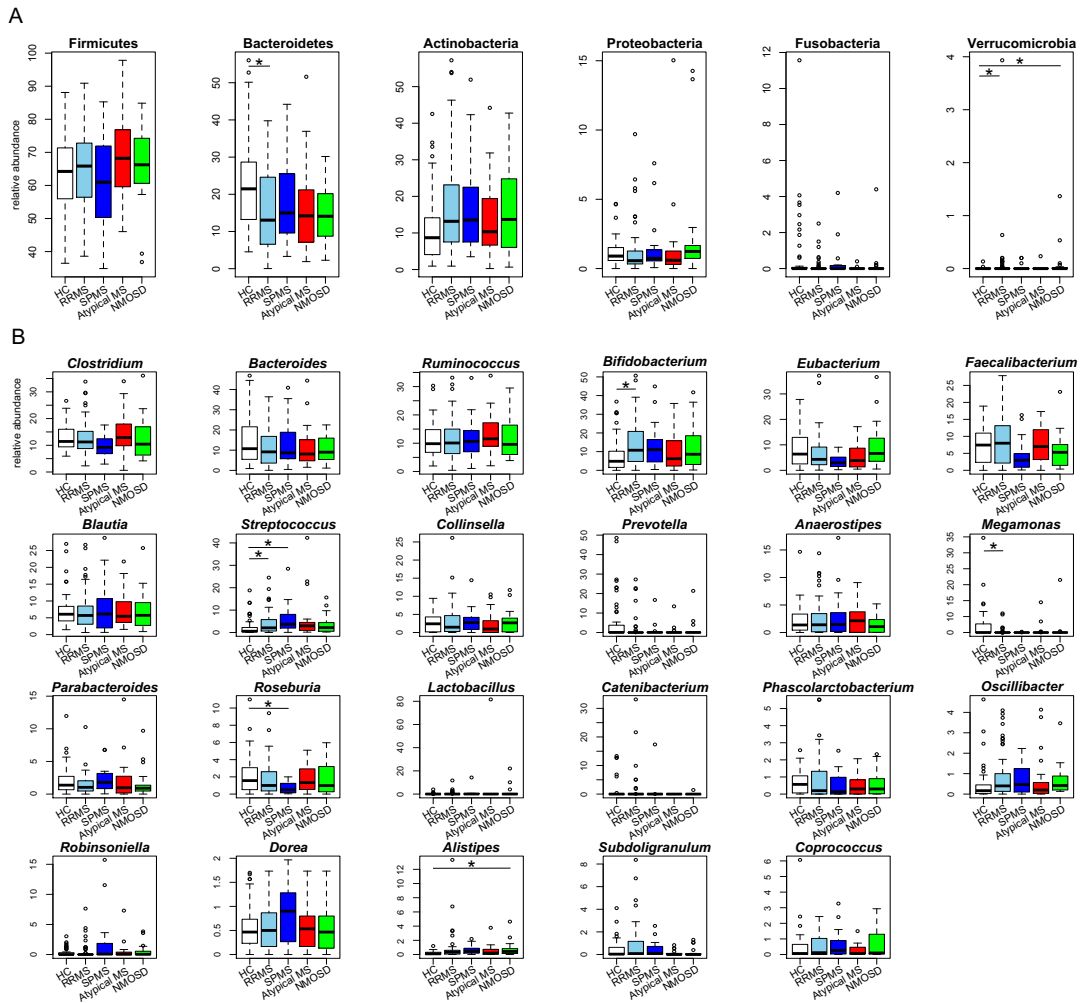

Figure S2

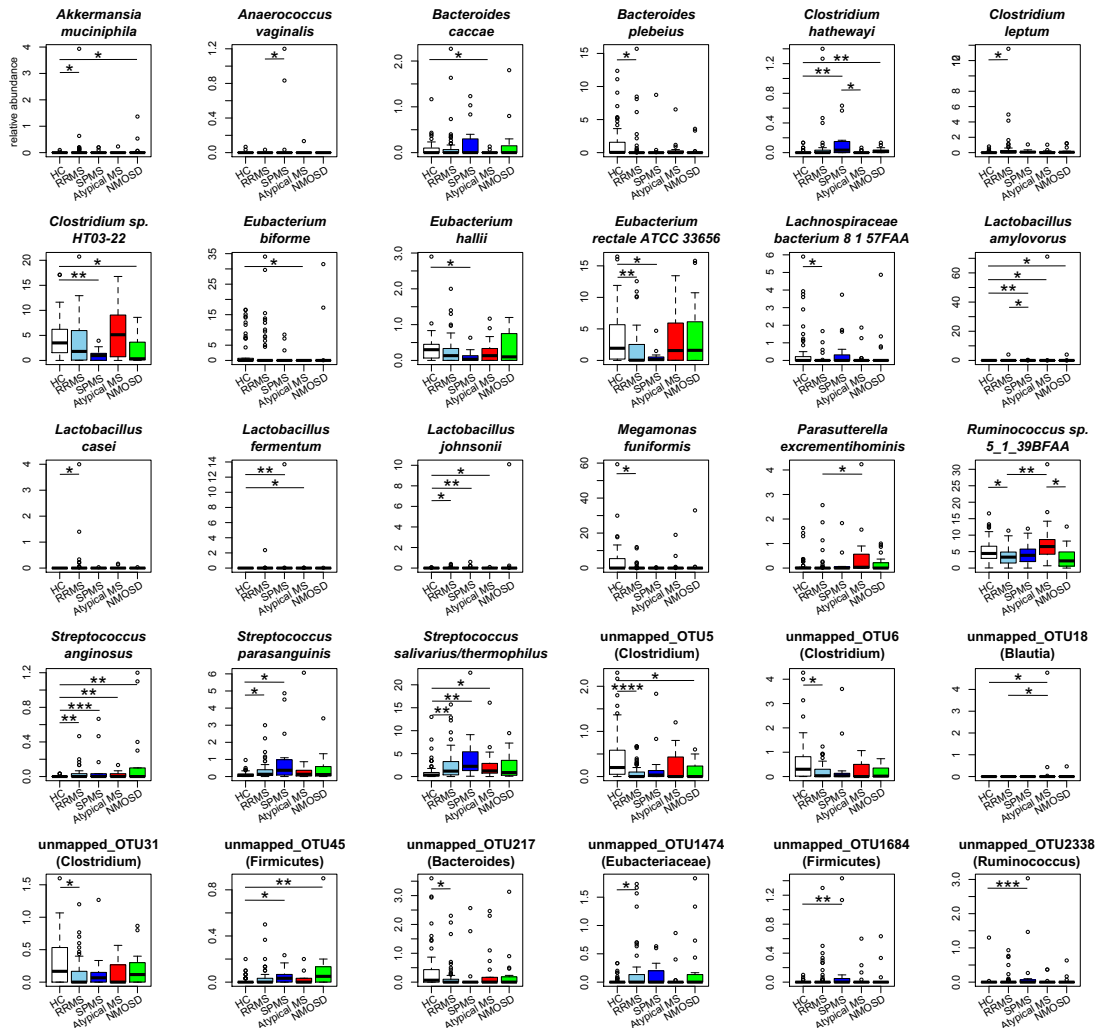

Figure S3

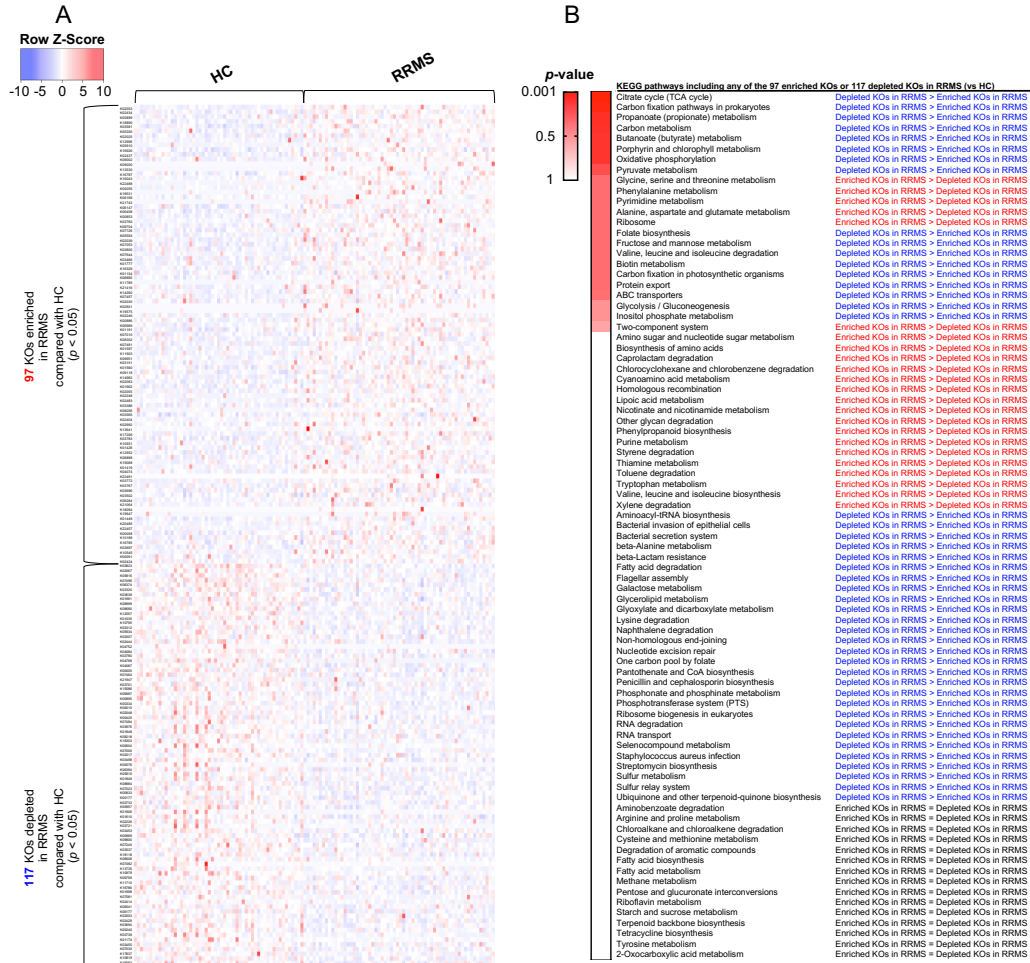



**Table S1**

|                        | HC (n = 55) | RRMS (n = 62) | SPMS (n = 15) | Atypical MS (n = 21) | NMOSD (n = 20) | p-value          |
|------------------------|-------------|---------------|---------------|----------------------|----------------|------------------|
| Age, year              | 40.0 ± 1.09 | 39.0 ± 1.00   | 43.3 ± 2.60   | 42.3 ± 1.82          | 43.1 ± 2.59    | 0.20             |
| Sex (female : male)    | 19 : 36     | 46 : 16       | 9 : 6         | 15 : 6               | 18 : 2         | <0.0001 / 0.23 A |
| BMI, kg/m <sup>2</sup> | 22.2 ± 0.30 | 22.0 ± 0.41   | 21.3 ± 0.69   | 22.2 ± 0.88          | 22.9 ± 1.03    | 0.46             |
| Onset age, year        |             | 30.0 ± 1.08   | 27.3 ± 2.25   | 34.7 ± 2.00          | 31.9 ± 2.53    | 0.08             |
| Disease duration, year |             | 9.0 ± 0.84    | 15.9 ± 1.54   | 7.6 ± 1.02           | 11.2 ± 1.77    | 0.002 / 0.40 B   |
| ARR                    |             | 0.68 ± 0.11   | 0.13 ± 0.13   | 1.05 ± 0.25          | 0.95 ± 0.22    | 0.02             |
| EDSS                   |             | 1.88 ± 0.17   | 5.53 ± 0.45   | 2.24 ± 0.32          | 3.55 ± 0.42    | <0.0001          |
| Immunotherapy          |             |               |               |                      |                |                  |
| Oral PSL, %            |             | 40 (n = 25)   | 60 (n = 9)    | 67 (n = 14)          | 95 (n = 19)    |                  |
| IS, %                  |             | 5 (n = 3)     | 27 (n = 4)    | 24 (n = 5)           | 45 (n = 9)     |                  |
| DMDs                   |             |               |               |                      |                |                  |
| IFN-β, %               |             | 37 (n = 23)   | 13 (n = 2)    | 14 (n = 3)           | 0              |                  |
| GA, %                  |             | 5 (n = 3)     | 0             | 0                    | 0              |                  |
| FTY, %                 |             | 6 (n = 4)     | 13 (n = 2)    | 5 (n = 1)            | 0              |                  |
| NTZ, %                 |             | 0             | 7 (n = 1)     | 0                    | 0              |                  |
| DMF, %                 |             | 3 (n = 2)     | 0             | 0                    | 0              |                  |

**Table S2**

| Category                                                         | No. subject                     | Weighted UniFrac |         | Unweighted UniFrac |         |
|------------------------------------------------------------------|---------------------------------|------------------|---------|--------------------|---------|
|                                                                  |                                 | R <sup>2</sup>   | p-value | R <sup>2</sup>     | p-value |
| HC (female) vs HC (male)                                         | Female: 19                      | 0.02             | 0.40    | 0.02               | 0.07    |
|                                                                  | Male: 36                        |                  |         |                    |         |
| RRMS receiving immunotherapy vs RRMS not receiving immunotherapy | Receiving immunotherapy: 50     | 0.02             | 0.46    | 0.02               | 0.28    |
|                                                                  | Not receiving immunotherapy: 12 |                  |         |                    |         |

**Table S3**

| Phylum         | Genus                        | Average relative abundance based on 16S data |              |              |              |              |         |
|----------------|------------------------------|----------------------------------------------|--------------|--------------|--------------|--------------|---------|
|                |                              | HC                                           | RRMS         | SPMS         | Atypical MS  | NMOSD        | Average |
| Bacteroidetes  | <i>Alistipes</i>             | 0.22 ± 0.03                                  | 0.80 ± 0.25  | 0.67 ± 0.17  | 0.51 ± 0.19  | 0.79 ± 0.24  | 0.6     |
| Firmicutes     | <i>Anaerostipes</i>          | 2.23 ± 0.35                                  | 2.65 ± 0.41  | 3.35 ± 1.23  | 2.66 ± 0.58  | 1.57 ± 0.41  | 2.49    |
| Bacteroidetes  | <i>Bacteroides</i>           | 14.26 ± 1.44                                 | 11.64 ± 1.25 | 13.82 ± 3.20 | 12.16 ± 2.39 | 10.04 ± 1.41 | 12.38   |
| Actinobacteria | <i>Bifidobacterium</i>       | 8.07 ± 1.22                                  | 13.02 ± 1.46 | 13.46 ± 3.39 | 9.95 ± 2.32  | 12.49 ± 2.74 | 11.4    |
| Firmicutes     | <i>Blautia</i>               | 7.33 ± 0.69                                  | 6.96 ± 0.72  | 8.17 ± 2.14  | 7.53 ± 1.21  | 7.35 ± 1.31  | 7.47    |
| Firmicutes     | <i>Catenibacterium</i>       | 0.95 ± 0.42                                  | 1.27 ± 0.66  | 1.16 ± 1.16  | 0            | 0.07 ± 0.07  | 0.69    |
| Firmicutes     | <i>Clostridium</i>           | 12.96 ± 0.62                                 | 12.61 ± 0.81 | 9.86 ± 1.13  | 14.21 ± 1.74 | 12.71 ± 1.79 | 12.47   |
| Actinobacteria | <i>Collinsella</i>           | 2.73 ± 0.33                                  | 3.23 ± 0.55  | 3.47 ± 0.97  | 2.60 ± 0.74  | 3.05 ± 0.74  | 3.01    |
| Firmicutes     | <i>Coprococcus</i>           | 0.44 ± 0.12                                  | 0.52 ± 0.09  | 0.71 ± 0.26  | 0.27 ± 0.08  | 0.75 ± 0.23  | 0.54    |
| Firmicutes     | <i>Dorea</i>                 | 0.56 ± 0.06                                  | 0.58 ± 0.06  | 0.82 ± 0.16  | 0.59 ± 0.11  | 0.56 ± 0.11  | 0.62    |
| Firmicutes     | <i>Eubacterium</i>           | 8.32 ± 0.97                                  | 7.08 ± 0.94  | 3.68 ± 0.77  | 5.83 ± 1.17  | 9.50 ± 2.09  | 6.88    |
| Firmicutes     | <i>Faecalibacterium</i>      | 7.05 ± 0.66                                  | 8.66 ± 0.88  | 4.52 ± 1.37  | 7.24 ± 1.13  | 5.97 ± 1.24  | 6.69    |
| Firmicutes     | <i>Lactobacillus</i>         | 0.16 ± 0.08                                  | 0.46 ± 0.21  | 1.12 ± 0.94  | 3.99 ± 3.88  | 1.91 ± 1.19  | 1.53    |
| Firmicutes     | <i>Megamonas</i>             | 4.18 ± 1.29                                  | 0.53 ± 0.27  | 0.04 ± 0.03  | 1.28 ± 0.94  | 1.72 ± 1.65  | 1.55    |
| Firmicutes     | <i>Oscillibacter</i>         | 0.44 ± 0.11                                  | 0.84 ± 0.14  | 0.72 ± 0.20  | 0.73 ± 0.27  | 0.69 ± 0.17  | 0.68    |
| Bacteroidetes  | <i>Parabacteroides</i>       | 2.11 ± 0.30                                  | 1.49 ± 0.20  | 2.36 ± 0.54  | 2.17 ± 0.73  | 1.72 ± 0.53  | 1.97    |
| Firmicutes     | <i>Phascolarctobacterium</i> | 0.67 ± 0.09                                  | 0.83 ± 0.16  | 0.57 ± 0.21  | 0.50 ± 0.13  | 0.60 ± 0.17  | 0.63    |
| Bacteroidetes  | <i>Prevotella</i>            | 5.44 ± 1.49                                  | 1.70 ± 0.71  | 1.47 ± 1.12  | 0.88 ± 0.64  | 1.59 ± 1.10  | 2.22    |
| Firmicutes     | <i>Robinsoniella</i>         | 0.32 ± 0.09                                  | 0.46 ± 0.16  | 2.35 ± 1.23  | 0.57 ± 0.35  | 0.58 ± 0.26  | 0.86    |
| Firmicutes     | <i>Roseburia</i>             | 2.19 ± 0.29                                  | 1.62 ± 0.24  | 0.75 ± 0.18  | 1.70 ± 0.34  | 1.69 ± 0.40  | 1.59    |
| Firmicutes     | <i>Ruminococcus</i>          | 11.23 ± 0.81                                 | 11.37 ± 0.92 | 11.54 ± 2.11 | 13.56 ± 1.64 | 11.85 ± 1.69 | 11.91   |
| Firmicutes     | <i>Streptococcus</i>         | 2.30 ± 0.52                                  | 4.10 ± 0.64  | 6.40 ± 1.89  | 6.07 ± 2.26  | 3.67 ± 0.98  | 4.51    |
| Firmicutes     | <i>Subdoligranulum</i>       | 0.42 ± 0.11                                  | 0.86 ± 0.21  | 0.50 ± 0.20  | 0.13 ± 0.05  | 0.20 ± 0.09  | 0.42    |

Table S4

| Species/OTU ID   | Closest species                              | Identity (%) 1 | Group 1 (G1) | Increase or decrease | Group 2 (G2) | LOG10 (G1 / G2) 2 | Average relative abundance in G2 (%) | Adjusted p-value (G1 vs G2) |
|------------------|----------------------------------------------|----------------|--------------|----------------------|--------------|-------------------|--------------------------------------|-----------------------------|
| mapped_CL5       | <i>Streptococcus parasanguinis</i>           | -              | RRMS         | >                    | HC           | 0.43              | 0.12                                 | 0.03                        |
| mapped_CL5       | <i>Streptococcus parasanguinis</i>           | -              | SPMS         | >                    | HC           | 0.93              | 0.12                                 | 0.03                        |
| mapped_CL9       | <i>Anaerococcus vaginalis</i>                | -              | SPMS         | >                    | RRMS         | 2.41              | 0.0005                               | 0.04                        |
| mapped_CL14      | <i>Bacteroides caccae</i>                    | -              | Atypical MS  | <                    | HC           | -0.96             | 0.09                                 | 0.03                        |
| mapped_CL78      | <i>Eubacterium hallii</i>                    | -              | SPMS         | <                    | HC           | -0.49             | 0.34                                 | 0.04                        |
| mapped_CL121     | <i>Streptococcus anginosus</i>               | -              | RRMS         | >                    | HC           | 1.13              | 0.002                                | 0.01                        |
| mapped_CL121     | <i>Streptococcus anginosus</i>               | -              | SPMS         | >                    | HC           | 1.72              | 0.002                                | 0.0004                      |
| mapped_CL121     | <i>Streptococcus anginosus</i>               | -              | Atypical MS  | >                    | HC           | 1.05              | 0.002                                | 0.002                       |
| mapped_CL121     | <i>Streptococcus anginosus</i>               | -              | NMOISD       | >                    | HC           | 1.95              | 0.002                                | 0.004                       |
| mapped_CL124     | <i>Lactobacillus casei</i>                   | -              | RRMS         | >                    | HC           | 0.49              | 0                                    | 0.03                        |
| mapped_CL126     | <i>Bacteroides plebeius</i>                  | -              | RRMS         | <                    | HC           | -0.30             | 1.48                                 | 0.01                        |
| mapped_CL129     | <i>Lactobacillus fermentum</i>               | -              | SPMS         | >                    | HC           | 1.44              | 0                                    | 0.008                       |
| mapped_CL129     | <i>Lactobacillus fermentum</i>               | -              | Atypical MS  | >                    | HC           | -0.85             | 0                                    | 0.04                        |
| mapped_CL145     | <i>Eubacterium rectale ATCC 33656</i>        | -              | RRMS         | <                    | HC           | -0.33             | 3.60                                 | 0.005                       |
| mapped_CL145     | <i>Eubacterium rectale ATCC 33656</i>        | -              | SPMS         | <                    | HC           | -0.79             | 3.60                                 | 0.03                        |
| mapped_CL169     | <i>Clostridium sp. HT03-22</i>               | -              | SPMS         | <                    | HC           | -0.63             | 4.41                                 | 0.001                       |
| mapped_CL169     | <i>Clostridium sp. HT03-22</i>               | -              | NMOISD       | <                    | HC           | -0.34             | 4.41                                 | 0.04                        |
| mapped_CL206     | <i>Lachnospiraceae bacterium 8 1 57FAA</i>   | -              | RRMS         | <                    | HC           | -0.94             | 0.53                                 | 0.01                        |
| mapped_CL208     | <i>Akkermansia muciniphila</i>               | -              | RRMS         | >                    | HC           | 1.59              | 0.002                                | 0.03                        |
| mapped_CL208     | <i>Akkermansia muciniphila</i>               | -              | NMOISD       | >                    | HC           | 1.63              | 0.002                                | 0.04                        |
| mapped_CL267     | <i>Streptococcus salivarius/thermophilus</i> | -              | RRMS         | >                    | HC           | 0.34              | 1.16                                 | 0.004                       |
| mapped_CL267     | <i>Streptococcus salivarius/thermophilus</i> | -              | SPMS         | >                    | HC           | 0.57              | 1.16                                 | 0.002                       |
| mapped_CL267     | <i>Streptococcus salivarius/thermophilus</i> | -              | Atypical MS  | >                    | HC           | 0.33              | 1.16                                 | 0.02                        |
| mapped_CL271     | <i>Lactobacillus amylovorus</i>              | -              | SPMS         | >                    | HC           | 0.05              | 0                                    | 0.008                       |
| mapped_CL271     | <i>Lactobacillus amylovorus</i>              | -              | Atypical MS  | >                    | HC           | 2.01              | 0                                    | 0.04                        |
| mapped_CL271     | <i>Lactobacillus amylovorus</i>              | -              | NMOISD       | >                    | HC           | 0.79              | 0                                    | 0.03                        |
| mapped_CL271     | <i>Lactobacillus amylovorus</i>              | -              | SPMS         | <                    | RRMS         | -0.24             | 0.07                                 | 0.04                        |
| mapped_CL372     | <i>Ruminococcus sp. 5 1 39BFAA</i>           | -              | RRMS         | <                    | HC           | -0.17             | 5.24                                 | 0.04                        |
| mapped_CL372     | <i>Ruminococcus sp. 5 1 39BFAA</i>           | -              | RRMS         | <                    | Atypical MS  | -0.35             | 7.78                                 | 0.01                        |
| mapped_CL372     | <i>Ruminococcus sp. 5 1 39BFAA</i>           | -              | Atypical MS  | >                    | NMOISD       | 0.38              | 3.24                                 | 0.02                        |
| mapped_CL396     | <i>Lactobacillus johnsonii</i>               | -              | RRMS         | >                    | HC           | 0.93              | 0.003                                | 0.03                        |
| mapped_CL396     | <i>Lactobacillus johnsonii</i>               | -              | SPMS         | >                    | HC           | 1.41              | 0.003                                | 0.003                       |
| mapped_CL396     | <i>Lactobacillus johnsonii</i>               | -              | Atypical MS  | >                    | HC           | 0.76              | 0.003                                | 0.04                        |
| mapped_CL406     | <i>Parasutterella excrementihominis</i>      | -              | RRMS         | <                    | Atypical MS  | -0.58             | 0.44                                 | 0.02                        |
| mapped_CL428     | <i>Megamonas funiformis</i>                  | -              | RRMS         | <                    | HC           | -0.89             | 4.17                                 | 0.01                        |
| mapped_CL429     | <i>Eubacterium bifforme</i>                  | -              | Atypical MS  | <                    | HC           | -1.90             | 2.64                                 | 0.01                        |
| mapped_CL432     | <i>Clostridium leptum</i>                    | -              | RRMS         | >                    | HC           | 0.98              | 0.06                                 | 0.02                        |
| mapped_CL446     | <i>Clostridium hathewayi</i>                 | -              | SPMS         | >                    | HC           | 1.16              | 0.01                                 | 0.001                       |
| mapped_CL446     | <i>Clostridium hathewayi</i>                 | -              | NMOISD       | >                    | HC           | 0.50              | 0.01                                 | 0.006                       |
| mapped_CL446     | <i>Clostridium hathewayi</i>                 | -              | SPMS         | >                    | Atypical MS  | 1.02              | 0.01                                 | 0.03                        |
| unmapped_OTU5    | <i>Clostridium indolis</i>                   | 95.34          | RRMS         | <                    | HC           | -0.65             | 0.44                                 | 0.00002                     |
| unmapped_OTU5    | <i>Clostridium indolis</i>                   | 95.34          | NMOISD       | <                    | HC           | -0.55             | 0.44                                 | 0.04                        |
| unmapped_OTU6    | <i>Clostridium indolis</i>                   | 95.99          | RRMS         | <                    | HC           | -0.52             | 0.65                                 | 0.01                        |
| unmapped_OTU18   | <i>Blautia luti</i>                          | 94.12          | Atypical MS  | >                    | HC           | 0.87              | 0                                    | 0.04                        |
| unmapped_OTU18   | <i>Blautia luti</i>                          | 94.12          | RRMS         | <                    | Atypical MS  | -0.87             | 0.25                                 | 0.03                        |
| unmapped_OTU31   | <i>Clostridium symbiosum</i>                 | 93.83          | RRMS         | <                    | HC           | -0.38             | 0.31                                 | 0.03                        |
| unmapped_OTU45   | <i>Clostridiales 303A04</i>                  | 89.16          | SPMS         | >                    | HC           | 0.56              | 0.02                                 | 0.04                        |
| unmapped_OTU45   | <i>Clostridiales 303A04</i>                  | 89.16          | NMOISD       | >                    | HC           | 0.84              | 0.02                                 | 0.002                       |
| unmapped_OTU217  | <i>Bacteroides xyloxylicus</i>               | 94.75          | RRMS         | <                    | HC           | -0.40             | 0.44                                 | 0.04                        |
| unmapped_OTU1474 | <i>Eubacterium fissicatena</i>               | 93.56          | RRMS         | >                    | HC           | 0.80              | 0.03                                 | 0.02                        |
| unmapped_OTU1684 | <i>Anaerovorax odorimutans</i>               | 87.31          | SPMS         | >                    | HC           | 1.59              | 0.005                                | 0.005                       |
| unmapped_OTU2338 | <i>Ruminococcus obeum</i>                    | 95.98          | SPMS         | >                    | HC           | 1.13              | 0.02                                 | 0.0009                      |

Table S5

|                                   |                  | Species/OTUs in the study published in 2015 |            |            |            |            |            |            |            |            |            |            |            |            |            |            |                |                |                |                |                |                |
|-----------------------------------|------------------|---------------------------------------------|------------|------------|------------|------------|------------|------------|------------|------------|------------|------------|------------|------------|------------|------------|----------------|----------------|----------------|----------------|----------------|----------------|
|                                   |                  | relas00019                                  | relas00024 | relas00054 | relas00107 | relas00125 | relas00226 | relas00231 | relas00240 | relas00255 | relas00268 | relas00397 | relas00510 | relas00467 | relas00489 | relas00715 | unmap_OTU00005 | unmap_OTU00057 | unmap_OTU00078 | unmap_OTU00151 | unmap_OTU00273 | unmap_OTU00644 |
| Species/OTUs in the present study | mapped_CL5       | 68.85                                       | 68.51      | 89.24      | 78.06      | 77.27      | 75.42      | 78.64      | 82.58      | 69.93      | 70.45      | 78.83      | 69.61      | 81.05      | 77.42      | 77.12      | 76.38          | 78.96          | 78.03          | 80.46          | 78.06          | 77.81          |
|                                   | mapped_CL121     | 68.59                                       | 70.42      | 88.29      | 73.90      | 77.99      | 70.92      | 76.90      | 78.62      | 69.52      | 68.79      | 76.05      | 67.65      | 77.60      | 77.60      | 76.14      | 76.90          | 79.05          | 75.16          | 74.45          | 77.99          | 74.61          |
|                                   | mapped_CL124     | 68.59                                       | 68.47      | 80.89      | 80.37      | 78.85      | 75.32      | 81.33      | 81.00      | 72.12      | 68.37      | 82.79      | 75.08      | 81.17      | 79.13      | 81.64      | 78.37          | 78.68          | 78.98          | 77.50          | 75.54          | 76.64          |
|                                   | mapped_CL126     | 86.94                                       | 93.02      | 67.86      | 68.06      | 69.84      | 68.75      | 66.56      | 67.83      | 83.49      | 92.70      | 67.97      | 66.45      | 66.88      | 66.35      | 65.79      | 68.91          | 67.95          | 69.26          | 68.15          | 66.98          | 71.38          |
|                                   | mapped_CL145     | 72.08                                       | 69.45      | 79.68      | 89.57      | 82.12      | 75.00      | 90.68      | 96.01      | 70.06      | 66.03      | 79.94      | 71.66      | 90.61      | 90.80      | 87.54      | 88.47          | 89.78          | 88.71          | 87.85          | 91.02          | 87.65          |
|                                   | mapped_CL206     | 71.75                                       | 67.62      | 79.22      | 88.89      | 83.11      | 73.94      | 89.78      | 90.74      | 73.08      | 69.45      | 82.52      | 73.29      | 91.26      | 89.81      | 83.93      | 89.78          | 91.33          | 90.57          | 90.34          | 89.51          | 90.43          |
|                                   | mapped_CL208     | 71.38                                       | 71.38      | 72.39      | 74.07      | 79.04      | 72.97      | 74.32      | 75.08      | 73.90      | 72.11      | 80.34      | 75.60      | 76.95      | 76.69      | 76.29      | 73.99          | 72.64          | 74.83          | 74.07          | 73.40          | 73.74          |
|                                   | mapped_CL267     | 67.53                                       | 67.74      | 99.05      | 80.07      | 76.95      | 76.59      | 77.27      | 83.06      | 67.74      | 67.42      | 81.05      | 67.97      | 81.25      | 77.10      | 78.07      | 76.05          | 77.60          | 75.57          | 78.76          | 76.77          | 77.92          |
|                                   | mapped_CL372     | 70.55                                       | 68.69      | 79.55      | 86.60      | 82.72      | 71.75      | 88.44      | 90.34      | 69.84      | 67.20      | 82.47      | 70.36      | 88.03      | 87.23      | 84.59      | 87.77          | 88.05          | 87.42          | 85.62          | 89.72          | 85.36          |
|                                   | mapped_CL396     | 71.88                                       | 70.06      | 77.53      | 77.09      | 76.38      | 70.45      | 76.09      | 76.92      | 70.70      | 68.47      | 78.50      | 72.22      | 78.50      | 74.46      | 77.38      | 76.01          | 76.32          | 74.84          | 76.03          | 74.61          | 73.77          |
|                                   | mapped_CL428     | 70.07                                       | 70.39      | 77.12      | 80.13      | 99.38      | 75.84      | 78.62      | 80.33      | 73.44      | 71.38      | 82.57      | 70.16      | 78.69      | 80.33      | 79.48      | 78.95          | 79.28          | 80.13          | 77.63          | 79.02          | 78.43          |
|                                   | mapped_CL432     | 70.38                                       | 67.62      | 78.21      | 79.57      | 82.95      | 73.20      | 79.38      | 81.31      | 71.61      | 69.11      | 83.12      | 74.92      | 80.39      | 80.80      | 83.06      | 79.69          | 78.95          | 81.08          | 80.82          | 81.25          | 79.19          |
|                                   | unmapped_OTU5    | 72.64                                       | 71.61      | 76.13      | 86.29      | 79.02      | 72.94      | 90.65      | 89.13      | 71.86      | 67.41      | 81.23      | 71.99      | 89.64      | 91.88      | 85.05      | 96.88          | 91.59          | 98.75          | 97.51          | 88.51          | 95.65          |
|                                   | unmapped_OTU6    | 72.96                                       | 70.32      | 76.45      | 86.38      | 80.33      | 73.68      | 89.16      | 88.27      | 73.31      | 68.91      | 82.52      | 71.99      | 90.29      | 91.02      | 84.11      | 98.14          | 91.64          | 98.12          | 96.26          | 86.73          | 97.22          |
|                                   | unmapped_OTU31   | 70.87                                       | 66.35      | 78.83      | 85.49      | 79.34      | 71.75      | 91.56      | 88.58      | 72.12      | 67.09      | 80.58      | 73.29      | 89.00      | 90.43      | 86.09      | 93.19          | 99.07          | 90.60          | 91.28          | 89.47          | 92.59          |
|                                   | unmapped_OTU217  | 71.34                                       | 68.59      | 76.13      | 85.80      | 81.46      | 72.40      | 88.24      | 87.96      | 71.06      | 68.69      | 82.20      | 71.66      | 90.61      | 89.44      | 85.25      | 90.71          | 89.78          | 91.22          | 91.90          | 87.04          | 91.36          |
|                                   | unmapped_OTU1474 | 71.01                                       | 66.56      | 78.10      | 88.31      | 78.69      | 73.62      | 90.40      | 87.69      | 71.06      | 67.20      | 82.52      | 73.62      | 88.03      | 86.20      | 84.54      | 88.16          | 85.76          | 90.51          | 91.51          | 87.04          | 89.75          |

**Table S6**

| <b>Group 1 (G1)</b> | <b>Group 2 (G2)</b> | <b>KOs with significant changes in abundance</b> | <b>Significantly enriched KOs in G1 compared with G2</b> | <b>Significantly depleted KOs in G1 compared with G2</b> | <b>Number of KEGG pathways including at least one of the significantly enriched KOs or depleted KOs in G1 compared with G2</b> |
|---------------------|---------------------|--------------------------------------------------|----------------------------------------------------------|----------------------------------------------------------|--------------------------------------------------------------------------------------------------------------------------------|
| RRMS                | HC                  | 214                                              | 97                                                       | 117                                                      | 83                                                                                                                             |
| SPMS                | HC                  | 144                                              | 89                                                       | 55                                                       | 86                                                                                                                             |
| Atypical MS         | HC                  | 65                                               | 45                                                       | 20                                                       | 46                                                                                                                             |
| NMOSD               | HC                  | 149                                              | 105                                                      | 44                                                       | 80                                                                                                                             |
| SPMS                | RRMS                | 52                                               | 38                                                       | 14                                                       | 38                                                                                                                             |
| RRMS                | Atypical MS         | 48                                               | 10                                                       | 38                                                       | 33                                                                                                                             |
| RRMS                | NMOSD               | 39                                               | 4                                                        | 35                                                       | 29                                                                                                                             |
| SPMS                | Atypical MS         | 44                                               | 23                                                       | 21                                                       | 32                                                                                                                             |
| SPMS                | NMOSD               | 29                                               | 18                                                       | 11                                                       | 29                                                                                                                             |
| Atypical MS         | NMOSD               | 55                                               | 21                                                       | 34                                                       | 44                                                                                                                             |

**Table S7**

|                               | <b>HC (n = 8)</b> | <b>RRMS (n = 12)</b> | <b>SPMS (n = 9)</b> | <b>p-value</b> |
|-------------------------------|-------------------|----------------------|---------------------|----------------|
| <b>Age, year</b>              | 36.5 ± 2.24       | 39.0 ± 2.02          | 38.7 ± 1.56         | 0.64           |
| <b>Sex (female : male)</b>    | 4 : 4             | 7 : 5                | 5 : 4               | 0.93           |
| <b>BMI, kg/m<sup>2</sup></b>  | 21.8 ± 0.79       | 22.6 ± 1.20          | 21.3 ± 1.07         | 0.58           |
| <b>Onset age, year</b>        |                   | 28.5 ± 2.19          | 24.0 ± 1.43         | 0.14           |
| <b>Disease duration, year</b> |                   | 10.5 ± 2.54          | 14.7 ± 2.12         | 0.13           |
| <b>ARR</b>                    |                   | 0.67 ± 0.26          | 0.22 ± 0.22         | 0.21           |
| <b>EDSS</b>                   |                   | 1.83 ± 0.27          | 5.39 ± 0.55         | <0.0001        |
| <b>Immunotherapy, %</b>       |                   | 92 (n = 11)          | 89 (n = 8)          | >0.99          |
